# Supplementary material for: Status and Distribution of Waterbirds in a Natura 2000 Area: The Case of Gialova Lagoon, Messinia, Greece
Source: Frontiers journal article supplement (doi:10.3389/fevo.2020.501548), 2020-12-22
Supplement: Table_2.docx [file Table_2.docx]

Status and Distribution of Waterbirds in a Natura 2000 Area: The Case of Gialova Lagoon, Messinia, Greece

Giorgos Maneas1,2*, Dimitris Bousbouras3, Viggo Norrby1 and Håkan Berg1

1 Department of Physical Geography, Stockholm University, Stockholm, Sweden, 2 Navarino Environmental Observatory, Messinia, Greece, 3 Hellenic Ornithological Society, Athens, Greece

**Supplementary material**

**Table A2:** Species richness from each bird category during the different periods (based on observations during the period October 2016-January2019), and their percentage compared to the total number of species identified under each bird category.TOS is for Total Observed species.

| **Period** | | **Wintering** | | **Spring migration** | | **Breeding/ Nesting** | | **Autumn migration** | | **TOS** |
| --- | --- | --- | --- | --- | --- | --- | --- | --- | --- | --- |
| **Bird category** | | **Species** | **%** | **Species** | **%** | **Species** | **%** | **Species** | **%** |
| **Waterbirds** | Wildfowl | 9 | 69.2 | 13 | 100.0 | 2 | 15.4 | 5 | 38.5 | 13 |
| Grebes | 3 | 100.0 | 3 | 100.0 | 1 | 33.3 | 3 | 100.0 | 3 |
| Rails & Crakes | 3 | 100.0 | 3 | 100.0 | 0 | 0.0 | 3 | 100.0 | 3 |
| Waders | 10 | 38.5 | 19 | 73.1 | 2 | 7.7 | 16 | 61.5 | 26 |
| Gulls & Terns | 3 | 33.3 | 7 | 77.8 | 1 | 11.1 | 4 | 44.4 | 9 |
| Cormorants | 1 | 100.0 | 1 | 100.0 | 0 | 0.0 | 1 | 100.0 | 1 |
| Herons & Ibises | 4 | 40.0 | 8 | 80.0 | 1 | 10.0 | 5 | 50.0 | 10 |
| Flamingos | 1 | 100.0 | 1 | 100.0 | 0 | 0.0 | 1 | 100.0 | 1 |
| Sub-total | 34 | 51.5 | 55 | 83.3 | 7 | 10.6 | 38 | 57.6 | 66 |
| **Wetland-dependent species** | Birds of prey | 3 | 100.0 | 3 | 100.0 | 0 | 0.0 | 2 | 66.7 | 3 |
| Kingfishers | 1 | 100.0 | 1 | 100.0 | 0 | 0.0 | 1 | 100.0 | 1 |
| Cranes | 1 | 100.0 | 1 | 100.0 | 1 | 100.0 | 1 | 100.0 | 1 |
| Buntings | 1 | 100.0 | 1 | 100.0 | 0 | 0.0 | 1 | 100.0 | 1 |
| Swallows | 0 | 0.0 | 1 | 100.0 | 0 | 0.0 | 1 | 100.0 | 1 |
| Tits | 0 | 0.0 | 1 | 50.0 | 0 | 0.0 | 1 | 50.0 | 2 |
| Wablers | 2 | 33.3 | 6 | 100.0 | 4 | 66.7 | 3 | 50.0 | 6 |
| Sub-total | 8 | 53.3 | 14 | 93.3 | 5 | 33.3 | 10 | 66.7 | 15 |
| **Non-wetland species** | Birds of Prey | 2 | 28.6 | 4 | 57.1 | 2 | 28.6 | 4 | 57.1 | 7 |
| Owls | 0 | 0.0 | 0 | 0.0 | 2 | 66.7 | 1 | 33.3 | 3 |
| Crows | 3 | 60.0 | 4 | 80.0 | 2 | 40.0 | 4 | 80.0 | 5 |
| Bee-eaters | 0 | 0.0 | 1 | 50.0 | 0 | 0.0 | 1 | 50.0 | 2 |
| Swifts, Swallows, Martins | 1 | 16.7 | 4 | 66.7 | 6 | 100.0 | 3 | 50.0 | 6 |
| Pigeons & Doves | 0 | 0.0 | 1 | 33.3 | 2 | 66.7 | 2 | 66.7 | 3 |
| Wablers | 2 | 33.3 | 5 | 83.3 | 2 | 33.3 | 4 | 66.7 | 6 |
| Finches | 3 | 60.0 | 5 | 100.0 | 2 | 40.0 | 2 | 40.0 | 5 |
| Buntings | 0 | 0.0 | 3 | 100.0 | 1 | 33.3 | 3 | 100.0 | 3 |
| Sparrows | 0 | 0.0 | 2 | 100.0 | 1 | 50.0 | 2 | 100.0 | 2 |
| Tits | 0 | 0.0 | 2 | 100.0 | 1 | 50.0 | 0 | 0.0 | 2 |
| Flycatchers | 0 | 0.0 | 0 | 0.0 | 0 | 0.0 | 1 | 100.0 | 1 |
| Wheatears | 0 | 0.0 | 1 | 50.0 | 1 | 50.0 | 0 | 0.0 | 2 |
| Thrushes & Chats | 3 | 50.0 | 6 | 100.0 | 0 | 0.0 | 2 | 33.3 | 6 |
| Pipits & Wagtails | 2 | 25.0 | 8 | 100.0 | 1 | 12.5 | 4 | 50.0 | 8 |
| Shrikes | 0 | 0.0 | 0 | 0.0 | 0 | 0.0 | 2 | 100.0 | 2 |
| Larks | 0 | 0.0 | 2 | 100.0 | 1 | 50.0 | 1 | 50.0 | 2 |
| Wrens | 0 | 0.0 | 1 | 100.0 | 0 | 0.0 | 0 | 0.0 | 1 |
| Gamebirds | 0 | 0.0 | 1 | 100.0 | 0 | 0.0 | 0 | 0.0 | 1 |
| Starlings | 1 | 100.0 | 1 | 100.0 | 0 | 0.0 | 1 | 100.0 | 1 |
| Sub-total | 17 | 25.0 | 51 | 75.0 | 24 | 35.3 | 37 | 54.4 | 68 |
|  | **Total observed** | **59** | **39.6** | **120** | **80.5** | **36** | **24.2** | **85** | **57.0** | **149** |
